# Supplementary material
Source: HighWire-hosted journal article supplement (https://www.jneurosci.org/content/40/46/8938)
Supplement: inline-supplementary-material-1 [file inline-supplementary-material-1.docx]

**Extended Data Table 5-1.**

Regions showing main effect of inspection. For the “naive” inspection (Inspection 1 > Inspection 2), to obtain anatomically meaningful separation of the activation clusters, only effects surviving FWE correction at the *voxel* level are listed. For the “comparative” inspection (Inspection 2 > Inspection 1), effects surviving correction for a cluster defining threshold *p* < 0.001 are shown.

| Brain region | Peak |  |  |  | Cluster |
| --- | --- | --- | --- | --- | --- |
| Inspection 1 > Inspection 2 | MNI coordinates | *T* | *p*(FWE) |  | *k* |

| Putamen R Fusiform R Amygdala R vmPFC (BA 10) L Putamen L Amygdala L vmPFC (BA 10) R Cerebelum R Anterior cingulate R Putamen L Putamen L Putamen R STG R | 28 10 10 8.7 1.9e-4 104  24 -78 -2 8.5 2.5e-4 125  24 -2 -20 8.0 6.2e-4 92  -12 56 0 8.0 6.6e-4 295  -22 -2 -8 7.1 0.004 164  -24 -6 -16 6.7 0.008  14 54 2 6.8 0.007 16  26 -82 -40 6.7 0.008 26  10 32 -4 6.7 0.008 75  -26 6 8 6.5 0.012 32  -30 -18 2 6.4 0.017 17  26 -14 2 6.4 0.017 18  62 -2 -14 6.3 0.020 17 |
| --- | --- |
| Inspection 2 > Inspection 1 | *p*(unc.) *k* > 68 |
| Anterior Insula R IFG (BA 44) R Anterior Insula L DLPFC (BA 9) L | 32 26 -4 5.8 2.2e-6 224  48 18 8 5.3 8.9e-6 92  -28 24 -4 5.2 1.1e-5 123  -42 30 30 4.6 5.5e-5 77 |
